# Supplementary material for: A First Look at ARFome: Dual-Coding Genes in Mammalian Genomes
Source: PLOS journal article supplement (doi:10.1371/journal.pcbi.0030091), 2007-05-15
Supplement: S2 (10.1371/journal.pcbi.0030091.s002) [file journal.pcbi.0030091.s002]

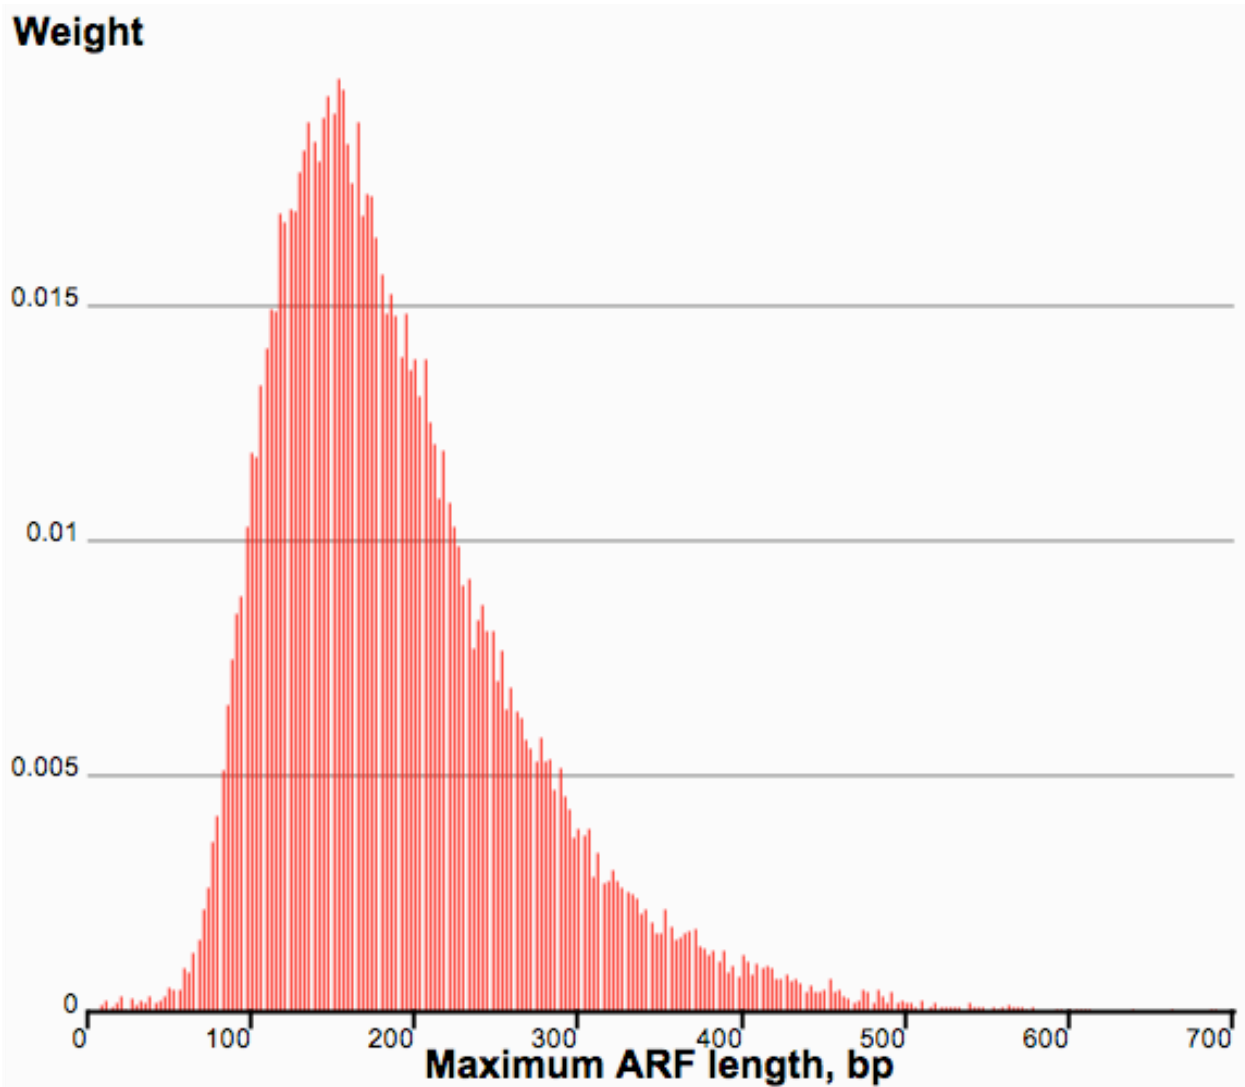

**Figure S2.** Distribution of lengths of maximal ARF, based on 35,000 parametric simulations based on codon model fits to orthologous gene alignments from 3 or 4 species (total of 39 gene fits, each with at least 500 bp sampled from equiprobably). Only 0.29% of simulated alignments had open ARF with 500 or more nucleotides.
