# Supplementary material for: A First Look at ARFome: Dual-Coding Genes in Mammalian Genomes
Source: PLOS journal article supplement (doi:10.1371/journal.pcbi.0030091), 2007-05-15
Supplement: S3 (10.1371/journal.pcbi.0030091.s003) [file journal.pcbi.0030091.s003]

| #  | gi #      | Gene     | RefSeq ID | GO categories                                                                                                                                                                                                                                                                                                                                         |
|----|-----------|----------|-----------|-------------------------------------------------------------------------------------------------------------------------------------------------------------------------------------------------------------------------------------------------------------------------------------------------------------------------------------------------------|
| 1  | 53831993  | SF3A1    | NM_005877 | GO:0003723,GO:0000389,GO:0000398,GO:0006464,GO:0008380,GO:0005634,GO:0005681                                                                                                                                                                                                                                                                          |
| 2  | 4758467   | GRP50    | NM_004224 | GO:0004872,GO:0008502,GO:0007165,GO:0007186,GO:0007267,GO:0005887,GO:0016020                                                                                                                                                                                                                                                                          |
| 3  | 4503680   | FCGBP    | NM_003890 |                                                                                                                                                                                                                                                                                                                                                       |
| 4  | 18201912  | FOXN1    | NM_003593 | GO:0003700,GO:0003704,GO:0043565,GO:0006350,GO:0006357,GO:0006952,GO:0007275,GO:0008544,GO:0009887,GO:0005634,GO:0030216,GO:0050673,GO:0003700,GO:0003707,GO:0003713,GO:0004886,GO:0005496,GO:0005515,GO:0008270,GO:0016439,GO:0043565,GO:0046872,GO:0006350,GO:0006355,GO:0005634,GO:0005515                                                         |
| 5  | 27436942  | RXRb     | NM_021976 |                                                                                                                                                                                                                                                                                                                                                       |
| 6  | 62954773  | CSMD2    | AB212622  | GO:0016020,GO:0016021                                                                                                                                                                                                                                                                                                                                 |
| 7  | 31342353  | ZNF598   | NM_178167 | GO:0003676,GO:0005515,GO:0008270,GO:0046872,GO:0005622                                                                                                                                                                                                                                                                                                |
| 8  | 14165285  | RHOBTB2  | NM_015178 | GO:0000166,GO:0005515,GO:0005525,GO:0007264,GO:0005622                                                                                                                                                                                                                                                                                                |
| 9  | 24041034  | NOTCH2   | NM_024408 | GO:0003706,GO:0004872,GO:0005509,GO:0005515,GO:0046982,GO:0001709,GO:0006350,GO:0006355,GO:0006916,GO:0006917,GO:0007050,GO:0007219,GO:0007399,GO:0008285,GO:0009887,GO:0016049,GO:0019827,GO:0030097,GO:0030154,GO:0046579,GO:0050793,GO:0005634,GO:0005887,GO:0009986,GO:0016020,GO:0005515,GO:0002011,GO:0030326,GO:0043065,GO:0007368,GO:0042060, |
| 10 | 6513852   | PCDH8    | AF061573  | GO:0005509,GO:0005515,GO:0007155,GO:0007156,GO:0007267,GO:0005886,GO:0005887,GO:0016331,GO:0001756                                                                                                                                                                                                                                                    |
| 11 | 37655178  | AP3B2    | NM_004644 | GO:0005215,GO:0005488,GO:0006892,GO:0006897,GO:0015031,GO:0005905,GO:0030137                                                                                                                                                                                                                                                                          |
| 12 | 109891936 | DLGAP4   | NM_014902 | GO:0007267,GO:0016020                                                                                                                                                                                                                                                                                                                                 |
| 13 | 48762935  | CSRP3    | NM_003476 | GO:0008270,GO:0046872,GO:0007519,GO:0030154,GO:0005634,GO:0005515,GO:0030018,GO:0002026,GO:0006874,GO:0048738                                                                                                                                                                                                                                         |
| 14 | 4758955   | BZRAP1   | NM_004758 | GO:0030156,GO:0008150,GO:0005737,GO:0005739                                                                                                                                                                                                                                                                                                           |
| 15 | 48255896  | SEMA6C   | NM_030913 | GO:0004872,GO:0007399,GO:0030154,GO:0016020,GO:0016021,GO:0007275                                                                                                                                                                                                                                                                                     |
| 16 | 38348329  | LANCL3   | NM_198511 |                                                                                                                                                                                                                                                                                                                                                       |
| 17 | 52856410  | CXXC1    | NM_014593 | GO:0003677,GO:0005515,GO:0008270,GO:0016563,GO:0045322,GO:0046872,GO:0006350,GO:0006355,GO:0005634,GO:0016607,GO:0016363                                                                                                                                                                                                                              |
| 18 | 4557256   | ADCY8    | NM_001115 | GO:0000287,GO:0008294,GO:0006171,GO:0007242,GO:0007611,GO:0005624,GO:0005886,GO:0016021                                                                                                                                                                                                                                                               |
| 19 | 38176156  | SPATA2   | NM_006038 | GO:0003674,GO:0007283,GO:0030154,GO:0005737                                                                                                                                                                                                                                                                                                           |
| 20 | 37537685  | ZSCAN21  | NM_145914 | GO:0003700,GO:0008270,GO:0016563,GO:0046872,GO:0006350,GO:0006355,GO:0005622,GO:0005634,GO:0005634,GO:0003677                                                                                                                                                                                                                                         |
| 21 | 122114640 | ZNF3     | NM_032924 | GO:0003676,GO:0008270,GO:0046872,GO:0006355,GO:0005622,GO:0005634,GO:0003700,GO:0006350,GO:0030154,GO:0045321                                                                                                                                                                                                                                         |
| 22 | 31317254  | NLGN2    | NM_020795 | GO:0042043,GO:0007416,GO:0016337,GO:0045217,GO:0016021,GO:0045211,GO:0045202                                                                                                                                                                                                                                                                          |
| 23 | 58257667  | KIAA0802 | AB018345  |                                                                                                                                                                                                                                                                                                                                                       |
| 24 | 27436945  | LMNA     | NM_170707 | GO:0005198,GO:0005515,GO:0005634,GO:0005882,GO:0005634,GO:0006998,GO:0005638                                                                                                                                                                                                                                                                          |
| 25 | 34147467  | CCDC120  | NM_033626 |                                                                                                                                                                                                                                                                                                                                                       |
| 26 | 28559070  | DNMT3A   | NM_175630 | GO:0003677,GO:0003886,GO:0005515,GO:0008168,GO:0008270,GO:0016740,GO:0046872,GO:0006306,GO:0006349,GO:0000791,GO:0005634,GO:0005737,GO:0016363,GO:0003677,GO:0003886,GO:0008168,GO:0008270,GO:0016740,GO:0006306,GO:0006349,GO:0000791,GO:0005634,GO:0005737,GO:0016363,GO:0005515,GO:0000122,GO:0007283,GO:0003682,GO:0000792,GO:0006346,GO:0005720  |
| 27 | 13376631  | ZC3H12A  | NM_025079 |                                                                                                                                                                                                                                                                                                                                                       |
| 28 | 53832025  | IQSEC2   | NM_015075 | GO:0005086,GO:0032012,GO:0005622                                                                                                                                                                                                                                                                                                                      |
| 29 | 18378730  | BBX      | NM_020235 | NM_020235                                                                                                                                                                                                                                                                                                                                             |

---

|    |           |                   |              |                                                                                                                          |
|----|-----------|-------------------|--------------|--------------------------------------------------------------------------------------------------------------------------|
| 30 | 113423421 | Predicted protein | XM_926122    |                                                                                                                          |
| 31 | 21071079  | FBXL7             | NM_012304    | GO:0004842,GO:0005515,GO:0006511,GO:0000151                                                                              |
| 32 | 14017860  | KIAA1822          | AB058725     | GO:0016021                                                                                                               |
| 33 | 6649056   | TMEM2             | AF137030     | GO:0005044,GO:0001620                                                                                                    |
| 34 | 18379331  | WAC               | NM_100486    |                                                                                                                          |
| 35 | 113204605 | RBAK              | NM_021163    | GO:0003676,GO:0008270,GO:0016564,GO:0046872,GO:0006355,GO:0005622,GO:0005634                                             |
| 36 | 117189905 | MINK1             | NM_153827    | GO:0000166,GO:0004674,GO:0005083,GO:0005524,GO:0016740,GO:0006468,GO:0006950,GO:0007243,GO:0007254,GO:0007275,GO:0045060 |
| 37 | 52145308  | LINGO1            | NM_032808    | GO:0016740                                                                                                               |
| 38 | 45433544  | KIAA0460          | NM_015203    |                                                                                                                          |
| 39 | 56790298  | PSD               | NM_002779    | GO:0004871,GO:0005086,GO:0007165,GO:0032012,GO:0005575,GO:0005622                                                        |
| 40 | 57165354  | LPHN1             | NM_001008701 | GO:0004872,GO:0004930,GO:0005529,GO:0016524,GO:0007165,GO:0007218,GO:0016020,GO:0016021                                  |

---

**Table S3.** GO categories of the 40 candidate genes.
