# Supplementary material for: A First Look at ARFome: Dual-Coding Genes in Mammalian Genomes
Source: PLOS journal article supplement (doi:10.1371/journal.pcbi.0030091), 2007-05-15
Supplement: S3 (10.1371/journal.pcbi.0030091.s003) [file journal.pcbi.0030091.s003]

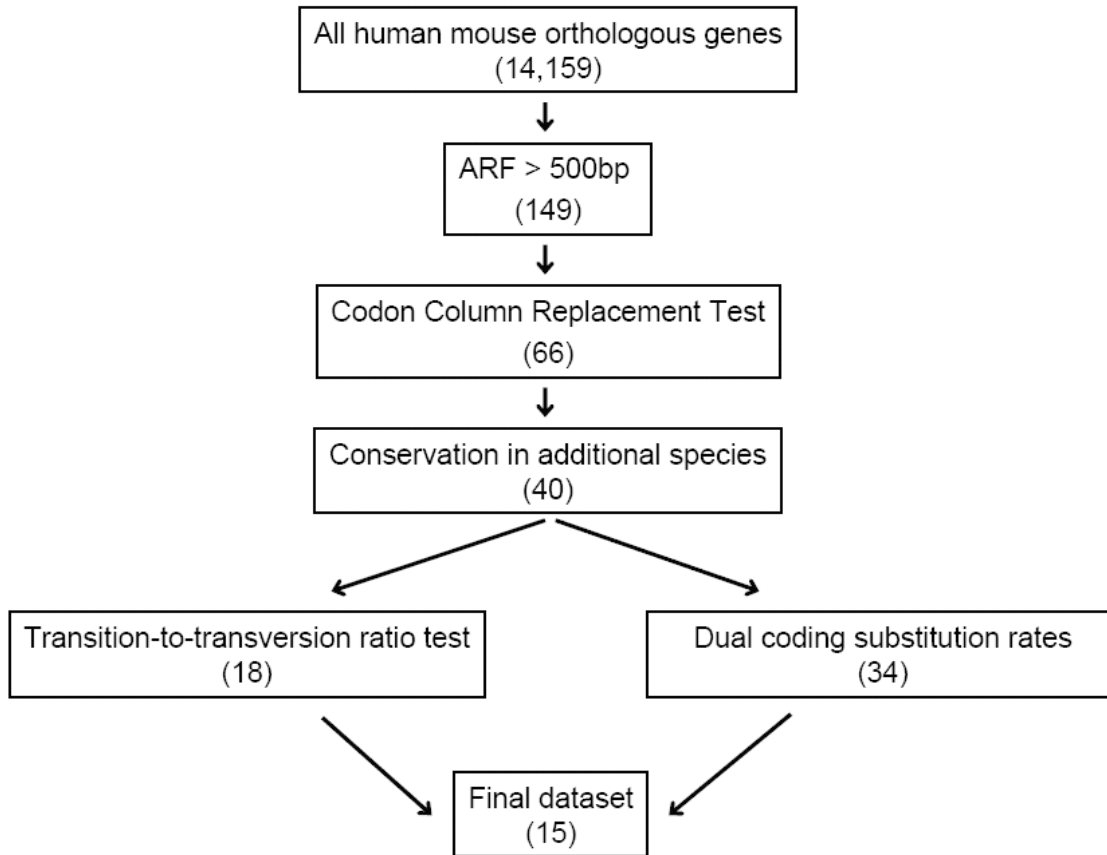

**Figure S3.** The number of possible dual coding genes (in parenthesis) and the corresponding criteria
