# Supplementary figures and images for: A First Look at ARFome: Dual-Coding Genes in Mammalian Genomes
Source: PLOS journal article supplement (doi:10.1371/journal.pcbi.0030091), 2007-05-15

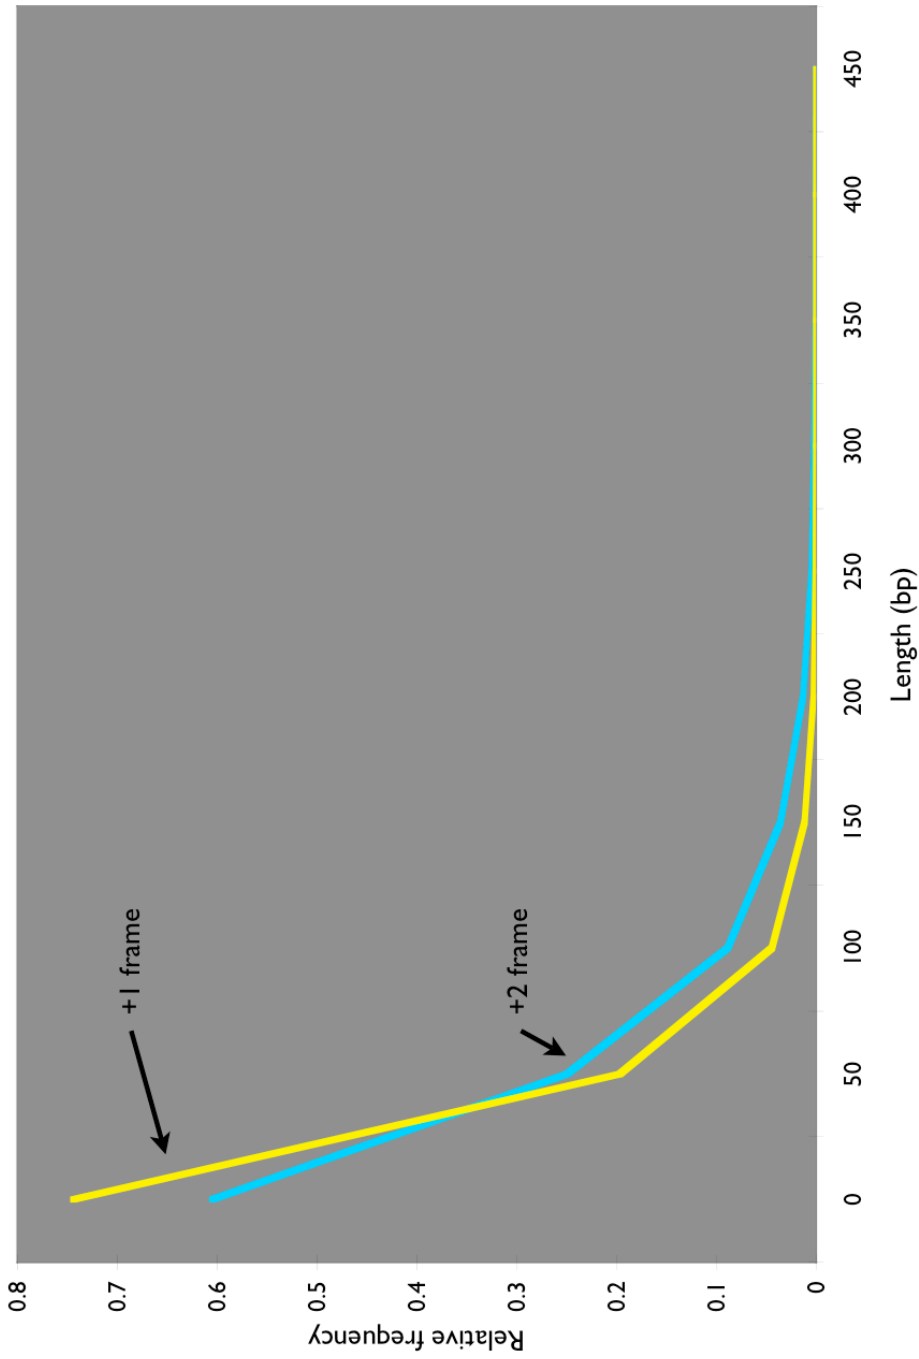

**Figure S1.** Distribution of lengths of maximal ARF detected in 10,000 simulated alignments.

Supplement: S1 (10.1371/journal.pcbi.0030091.s001) [file journal.pcbi.0030091.s001]
